# Supplementary material
Source: PubMed Central journal article supplement (PMC8863208)
Supplement: NIHMS1732417-supplement-Supplementary.pdf [file NIHMS1732417-supplement-Supplementary.pdf]

## Supplementary

### PHF10 subunit of PBAF complex mediates transcriptional activation by MYC

Soshnikova N.V.<sup>1\*</sup>, Tatarskiy E.V.<sup>1</sup>, Tatarskiy V.V.<sup>2</sup>, Klimenko N.S.<sup>3</sup>, Shtil A. A.<sup>2</sup>,  
Nikiforov M.A.<sup>4</sup>, Georgieva S.G.<sup>1,5\*</sup>

1 - Department of Eukaryotic Transcription Factors, Institute of Gene Biology, Russian Academy of Sciences, 34/5 Vavilov Street, Moscow 119334, Russia

2 - Laboratory of Molecular Oncobiology, Institute of Gene Biology, Russian Academy of Sciences, 34/5 Vavilov Street, Moscow 119334, Russia

3 - Center for Precision Genome Editing and Genetic Technologies for Biomedicine, Institute of Gene Biology, Russian Academy of Sciences, 34/5 Vavilov Street, Moscow 119334, Russia

4 - Department of Cancer Biology, Wake Forest University, Medical Center Drive, Winston-Salem, NC 27101, USA

5 - Department of Transcription Factors, Engelhardt Institute of Molecular Biology, Russian Academy of Sciences, 32 Vavilov Street, Moscow 119991, Russia

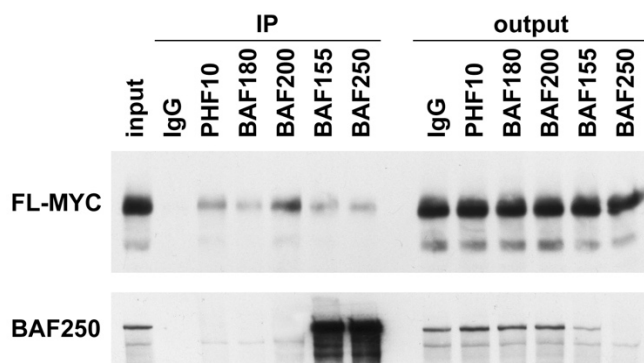

**Figure S1.** Interactions between MYC and chromatin remodeling complex determined by immunoprecipitation.

*Top:* Immunoprecipitation of recombinant FL-MYC by antibodies against PBAF-specific (PHF10, BAF180, BAF200), BAF-specific (BAF250) and the common core subunit BAF155 from HEK293T transiently transfected with FL-MYC construct.

*Bottom:* Precipitation of BAF250 by antibodies against BAF155 and BAF250 and depletion of BAF250 from cell lysates.

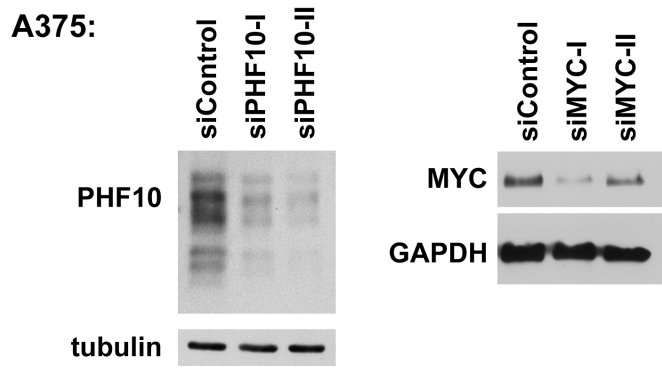

**Figure S2.** Knockdown of PHF10 and MYC in A375 cells using siRNA-I and siRNA-II.

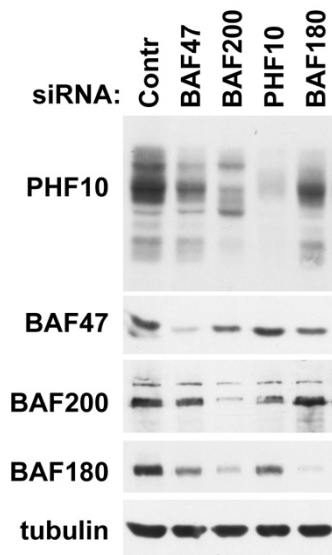

**Figure S3.** Decreased amounts of PHF10 upon siRNA knockdown of BAF47, BAF200, BAF180 and PHF10 in HEK293T cells.

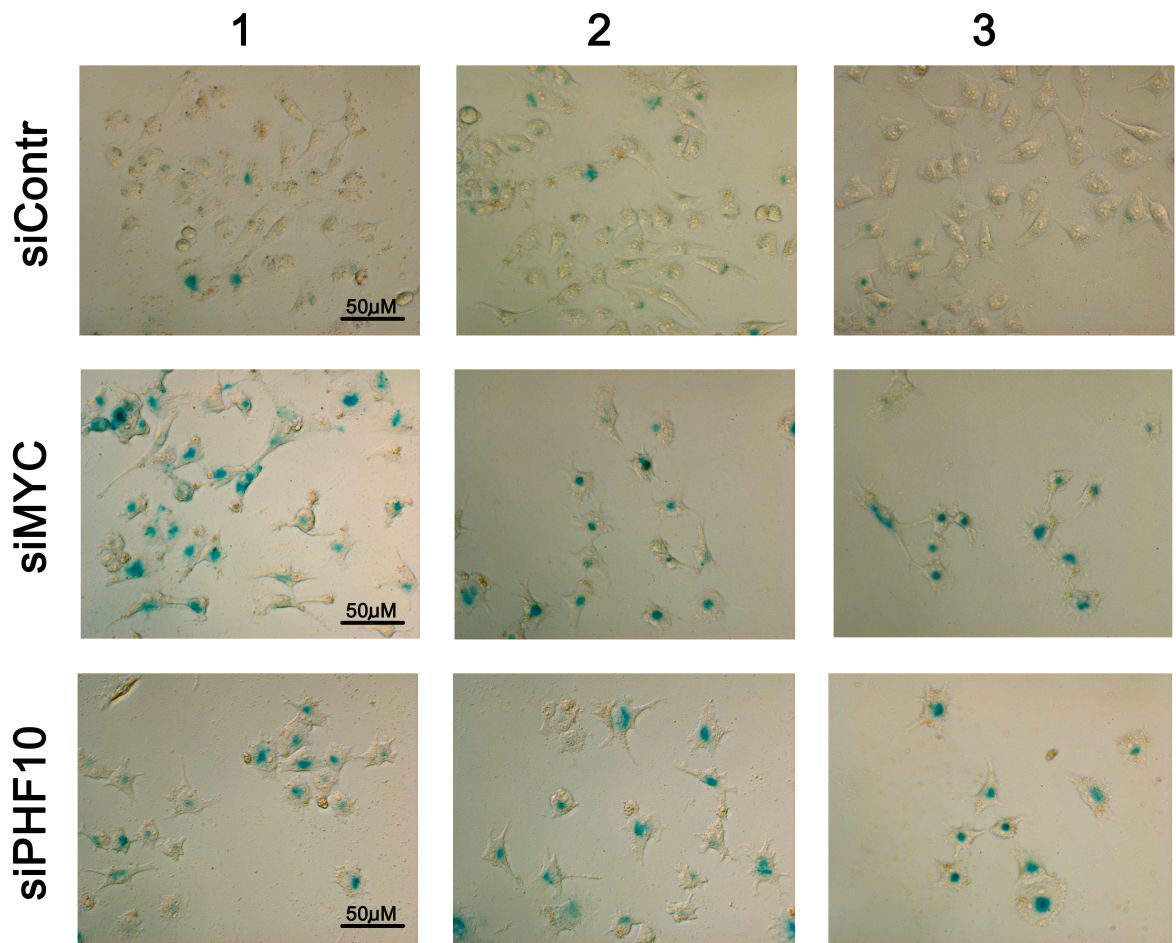

**Figure S4.** Senescence in A375 cells after knockdowns of PHF10 and MYC. Shown is staining for SA-β-galactosidase. See Figure 8 for bigger view fields. Numbers indicate independent view fields.

**Table S1. Sequences of primers for cloning**

| Primer            | Sequence                                   |
|-------------------|--------------------------------------------|
| MYC-MB-I for      | 5'-GCGAGTTGCAGCCCCCGTCGAGCCCGCTCCGGACTCTGC |
| MYC-MB-I rev      | 5'-CGGGGGCTGCAACTCGCTCTGCTGCTGCTG          |
| MYC-MB-II for     | 5'-TCATCAAAAACATCCTCGTCTCAGAGAAGCTGGC      |
| MYC-MB-II rev     | 5'-GAGGATGTTTTTGTGATGAAGGTCTCGTC           |
| MYC-MB-III for    | 5'-CGCCTCAGAGAACGACAGCAGCTCGCCC            |
| MYC-MB-III rev    | 5'-TGTCGTTCTCTGAGGCGGCGGCGCTCAG            |
| MYC-MB-IV for     | 5'-GCCACGTCTCCGCCAAGAGGGTCAAGTTGGAC        |
| MYC-MB-IV rev     | 5'-CTCTTGCGGAGACGTGGCACCTCTTGA             |
| MYC-MB-CTD for    | 5'-GGAGAATGTCTAATCAGCCTCGACTGTGCCTT        |
| MYC-MB-CTD rev    | 5'-AGGCTGATTAGACATTCTCCTCGGTGTCCG          |
| MYC-wt(XhoI) for  | 5'-CCTCGAGCTGGATTTTTTTCGGGTAGTGG           |
| MYC-wt(BamHI) rev | 5'-GGGATCCGTCGACTTACGCACAAGAGTTCCGTAGC     |

**Table S2. Sequences of siRNA**

| siRNA          | Sequence                     |
|----------------|------------------------------|
| siControl for  | 5'-AGGUCGAACUACGGGUCAAdTdC   |
| siControl rev  | 5'-UUGACCCGUAGUUCGACCUdAdG   |
| siPHF10-I for  | 5'-CAGCAUUGCGCAGUGAUGAAGdTdT |
| siPHF10-I rev  | 5'-CUUCAUCACUGCGCAAUGCUGdTdT |
| siPHF10-II for | 5'-AAGGUCAGUUCUUACCCAGUGdTdT |
| siPHF10-II rev | 5'-CACUGGGUAGAACUGACCUUdTdT  |
| siMYC-I for    | 5'-CCUGAGACAGAUCAGCAACAdTdT  |
| siMYC-I rev    | 5'-UGUUGCUGAUCUGUCUCAGGdTdT  |
| siMYC-II for   | 5'-CCAGAGGAGGAACGAGCUAAAdTdT |
| siMYC-II rev   | 5'-UUAGCUCGUUCCUCCUCUGGdTdT  |

**Table S3. Primers for ChIP**

| Primer      | Sequence                   |
|-------------|----------------------------|
| DDX18 for   | 5'-CGTCTGGAAGCATTTCGCG     |
| DDX18 rev   | 5'-CTTACGCAGGAGTTTCATCGGC  |
| APEX1 for   | 5'-AGAGAATTAGAGGAGGGAGGCG  |
| APEX1 rev   | 5'-CGTTCAGACTGCCAGCGAAGC   |
| NOV for     | 5'-CCACCCTCTGGGAAAAGCCA    |
| NOV rev     | 5'-GTGGGGAAGTGGAACGAACC    |
| EIF4E for   | 5'-GCCGATGGGTAGGGTGCG      |
| EIF4E rev   | 5'-GGCAACTTGTCTGGGACCTC    |
| E2F1 for    | 5'-AAGAGGTGGCTGATGGCTGG    |
| E2F1 rev    | 5'-GACGCTCCCGCATCCCACTG    |
| TYMS for    | 5'-CCACTTGCTTCGGTTGCTTC    |
| TYMS rev    | 5'-GCCTTCTCTAAGCCAGCAGCAC  |
| ETS1 for    | 5'-CAAGCCGACTCTCACCATCATC  |
| ETS1 rev    | 5'-CAACAGTCCTCCTCCTCCTCCTC |
| Control for | 5'-CCTTTCCTTGGTTGCTCTGTGC  |
| Control rev | 5'-CAACAGTCCTCCTCCTCCTCCTC |

**Table S4. Primers for RT-PCR**

| <b>Primer</b> | <b>Sequence</b>                |
|---------------|--------------------------------|
| CycE2 for     | 5'-TTACGTCACTGATGGTGCTTGC      |
| CycE2 rev     | 5'-GCCAGGAGATGATTGTTACAGG      |
| ETS1 for      | 5'- GCTGGACAGGAGATGGCTGG       |
| ETS1 rev      | 5'- CGCTGTCTTGTGGATGATGTT      |
| E2F1 for      | 5'- GACGTGTCAGGACCTTCGTAGC     |
| E2F1 rev      | 5'- ACGGTCTCCTCAGGGCACAG       |
| E2F6 for      | 5'-GCTCCAGCAGAAACCAGATTGG      |
| E2F6 rev      | 5'-CCGACACCTTCAGACCTTTTG       |
| TYMS for      | 5'- CCTGAATCACATCGAGCCACTG     |
| TYMS rev      | 5'- CATCCAGCCCAACCCCTAAA       |
| APEX1 for     | 5'-GACAAAGAGGCAGCAGGAGAGG      |
| APEX1 rev     | 5'-GAAGGCACAGTATATCTGGGGC      |
| RPLP0 for     | 5'-ACTGGAGACAAAGTGGGAGCC       |
| RPLP0 rev     | 5'-CAGACACTGGCAACATTGCG        |
| MYC for       | 5'- CACCGAGTCGTAGTCGAGGT       |
| MYC rev       | 5'- TTTCGGGTAGTGGAAAACCA       |
| PHF10 for     | 5'- CCGGGAACGCATGGAAGAAAG      |
| PHF10 rev     | 5'- CACCATCACTGTCTAGAGCAGGGAGC |
